# Supplementary material for: Demonstration of a low power and high-speed graphene/silicon heterojunction near-infrared photodetector
Source: Royal Society of Chemistry journal article supplement (doi:10.1039/d4na00286e), 2024-01-01
Supplement: d4na00286e1.pdf [file d4na00286e1.pdf]

## Supporting Information

### **Demonstration of low power high-speed graphene/Silicon heterojunction near-infrared photodetector**

Min Gyu Kwon,<sup>a</sup> Cihyun Kim,<sup>b</sup> Seung-Mo Kim,<sup>b</sup> Tae Jin Yoo,<sup>b</sup> Yongsu Lee,<sup>b</sup> Hyeon Jun Hwang,<sup>c</sup> Sanghan Lee\*<sup>a</sup> and Byoung Hun Lee\*<sup>b</sup>

a. School of Materials Science and Engineering, Gwangju Institute of Science and Technology (GIST), 123, Cheomdangwagi-ro, Buk-gu, Gwangju 61005, Republic of Korea. E-mail: [sanghan@gist.ac.kr](mailto:sanghan@gist.ac.kr)

b. Department of Electrical Engineering, Pohang University of Science and Technology (POSTECH), 77, Cheongam-ro, Nam-gu, Pohang-si, Gyeongsangbuk-do 37673, Republic of Korea. E-mail: [bhlee1@postech.ac.kr](mailto:bhlee1@postech.ac.kr)

c. Department of Semiconductor Engineering, Mokpo National University, 1666, Yeongsan-ro, Cheonggye-myeon, Muan-gun, Jeollanam-do 58554, Republic of Korea.

## 1. Transferred graphene on patterned SiO<sub>2</sub>/Si substrate

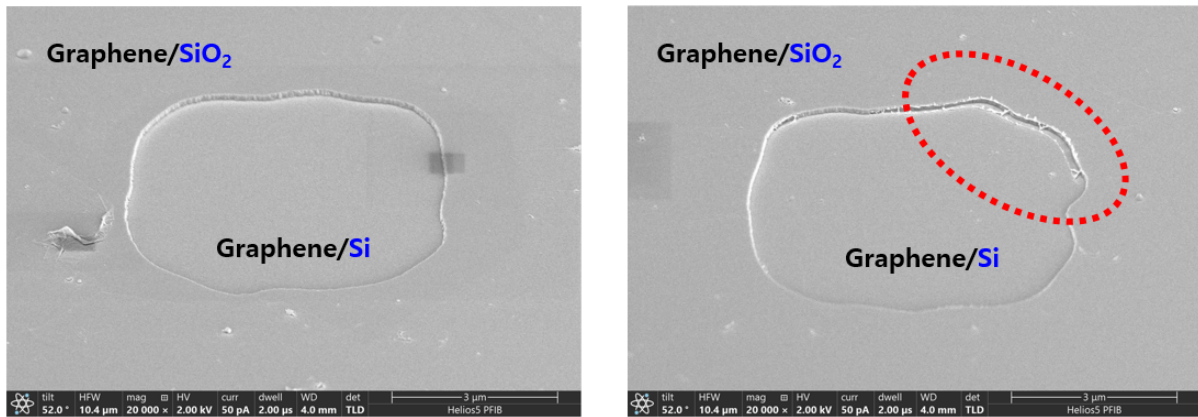

Fig. S1 (a) SEM image of SiO<sub>2</sub>/Si substrate with partially etched Si (b) Graphene image with some damage (red circle area)

## 2. Setup for measuring the photocurrent characteristics

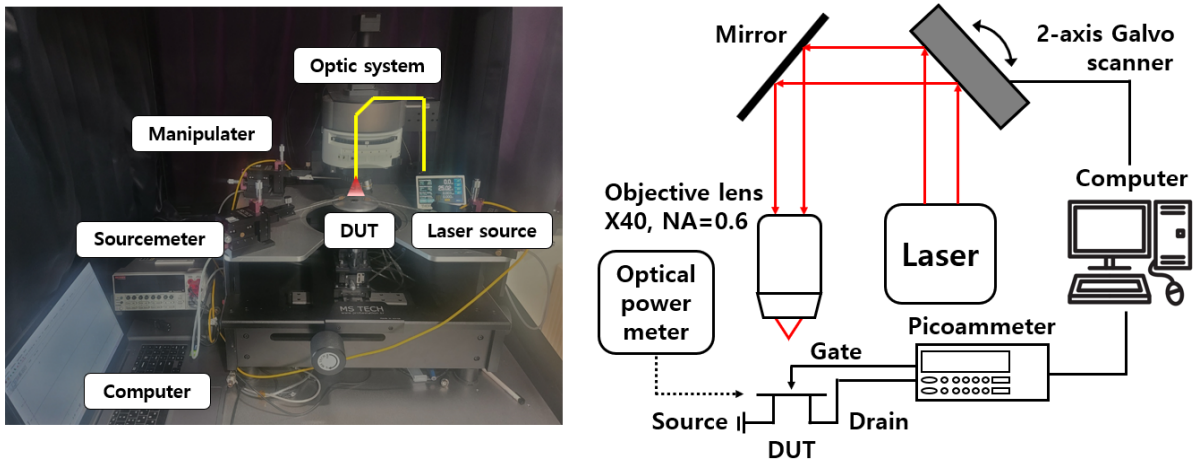

**Fig. S2.** (a) The measurement setup for photocurrent characteristics (b) Diagram of the photocurrent measurement setup

A continuous-wave laser beam of 850 nm wavelength from the solid-state laser diode and controller (Thorlabs LP850-SF30) was focused onto the sample through a 40 $\times$  objective lens (Olympus LUCPlanFLN, 40 $\times$ , NA=0.6). Electrical measurements were performed using the Keithley Model 4200 parameter analyzer. The Newport Model 1918-C hand-held optical power meter and 919P-003-10 thermopile sensor were used to measure the optical power. All measurements were performed under ambient conditions ( $T = 300$  K,  $P = 1$  atm) in the air.

### 3. Dirac voltage of graphene

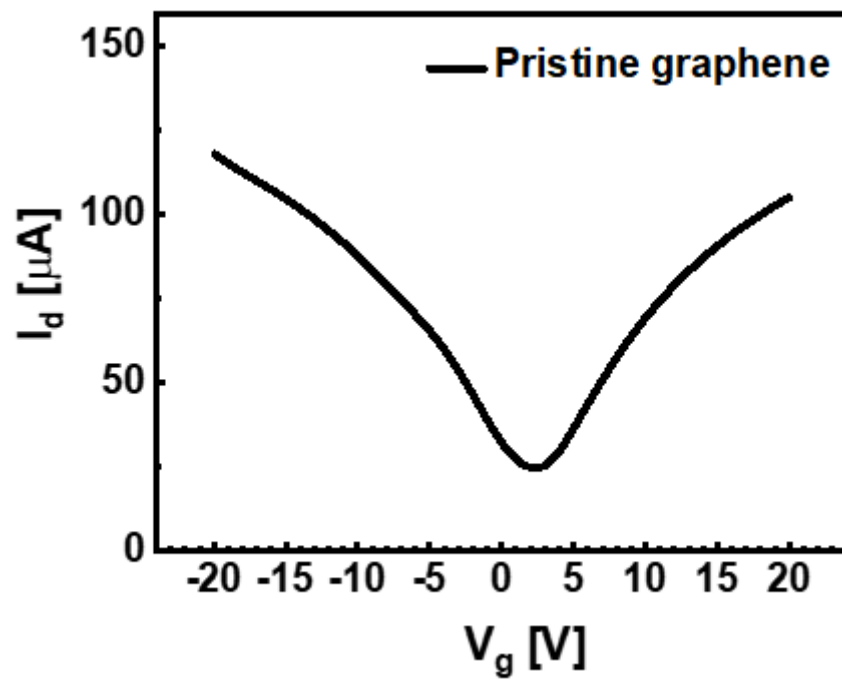

**Fig. S3:** Dirac voltage of the graphene

Dirac voltage at the graphene FET used to fabricate the devices. The Dirac point exists between approximately 2 and 3 V.

#### 4. Device parameters used to extract the Schottky barrier height

| Parameter                                    | Value          |
|----------------------------------------------|----------------|
| Temperature [K]                              | 300            |
| Si carrier concentration [ $cm^{-3}$ ]       | $10^{18}$      |
| Si Richardson constant [ $A/cm^2K^2$ ]       | 120            |
| Device area (Graphene channel) [ $\mu m^2$ ] | $50 \times 50$ |

**Table S1.** Our device parameters used to extract the Schottky barrier height at I–V curve

The Schottky barrier height of our device was calculated using the reverse saturation current by I–V characteristics at a fixed temperature. Equation (1) in the text can be expressed as the equation below, and  $\ln(I_S)$  allows the calculation of the Schottky barrier height.<sup>1,2</sup>

$$I = AA^* T^2 \exp\left(-\frac{q\Phi_b}{kT}\right) \left[ \exp\left(\frac{qV}{nkT}\right) - 1 \right], \quad (1)$$

$$\ln \left[ \frac{I}{1 - \exp\left(-\frac{qV}{nkT}\right)} \right] = \ln I_S + V \left( \frac{q}{nkT} \right),$$

Where  $I_S$  is the reverse saturation current of the Schottky diode, A is the device area,  $A^*$  is the Richardson constant of Si.

$$\phi_b = \frac{kT}{q} \ln \left( \frac{AA^* T^2}{I_S} \right)$$

## 5. Calculation of carrier collection time in bulk Si-based photodetector

Under illumination conditions, a photocarrier is formed, and photocurrent flows as the generated carriers move to the electrode. In general, photocarriers are generated in the depletion region of the graphene/Si junction, but in the case of a graphene/bulk Si photodetector, additional gain can be obtained by forming carriers far away from the Si substrate.<sup>3</sup> To calculate the approximate photocurrent rise time of the Graphene/bulk Si photodetector, the equations and parameters below were used.

$$v = \mu E, \quad (\text{Carrier velocity} = \text{mobility} \times \text{electric field}) \quad (2)$$

$$E = -\frac{qN_D W}{\epsilon_S} \quad (\text{Electric field})$$

$$W = \left[ \frac{2\epsilon_S}{qN_D} (V_{bi} - V_a) \right]^{1/2} \quad (\text{Depletion width})$$

| Parameter                                 | Value                              |
|-------------------------------------------|------------------------------------|
| Donor density, $N_D$ [ $\text{cm}^{-3}$ ] | $10^{17} \sim 10^{18}$             |
| Si permittivity, $\epsilon_S$ [F/m]       | $11.8 \times 8.85 \times 10^{-12}$ |
| Elementary charge, $q$ [C]                | $1.602 \times 10^{-19}$            |

**Table S2.** Our device parameters used to calculate the rise time

Rise time was calculated using the carrier velocity obtained above. Not all parts of the bulk Si substrate were considered (it was assumed that photocarrier generation would be minimal in areas too far away), and it was assumed that carriers were collected up to the boundary of the drain electrode. As a result, the rise time was calculated to be approximately 11 to 22.1  $\mu\text{s}$ , which was consistent with the actual measured value (12.6  $\mu\text{s}$ ).

## References

- 1 D. K. Schroder, *Semiconductor material and device characterization*, John Wiley & Sons, Inc., New York, 2005.
- 2 E. H. Rhoderick and R. H. Williams, *Metal–Semiconductor Contacts*, Clarendon press, Oxford, 1988.
- 3 K. E. Chang, T. J. Yoo, C. Kim, Y. J. Kim, S. K. Lee, S–Y. Kim, S. Heo, M. G. Kwon and B. H. Lee, *Small*, 2018, **14**, 1801182.
